# Supplementary material for: Exploiting pyocyanin to treat mitochondrial disease due to respiratory complex III dysfunction
Source: PubMed Central journal article supplement (PMC8032734; doi:10.1038/s41467-021-22062-x), 2021-04-08
Supplement: 41467_2021_22062_MOESM1_ESM.pdf [file 41467_2021_22062_MOESM1_ESM.pdf]

# Figure S1

**a**

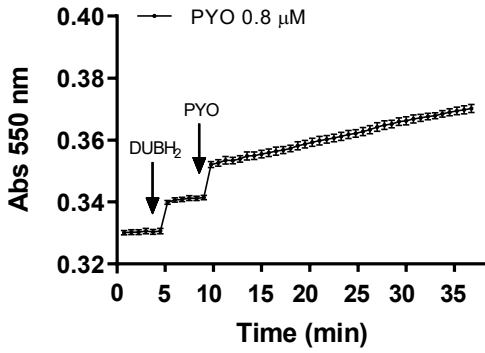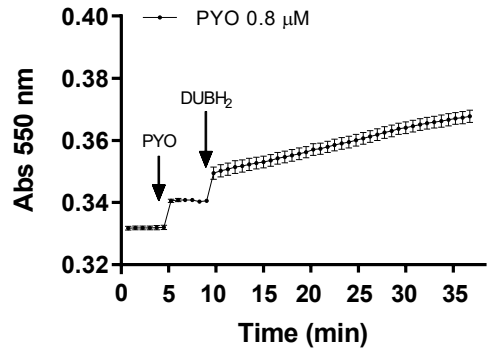

**b**

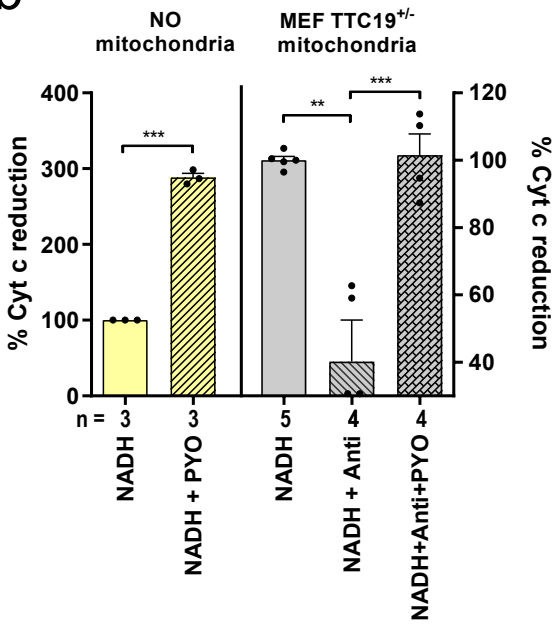

**c**

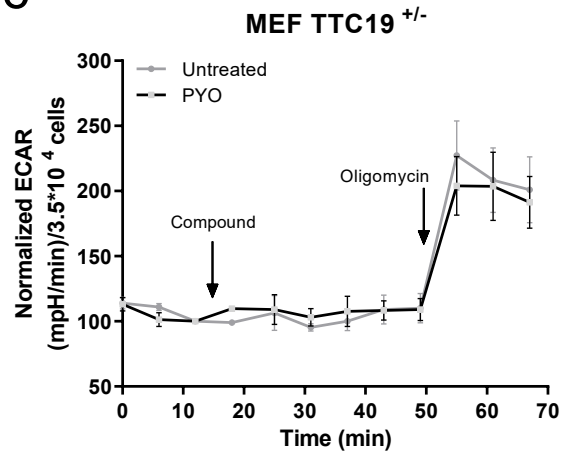

**d**

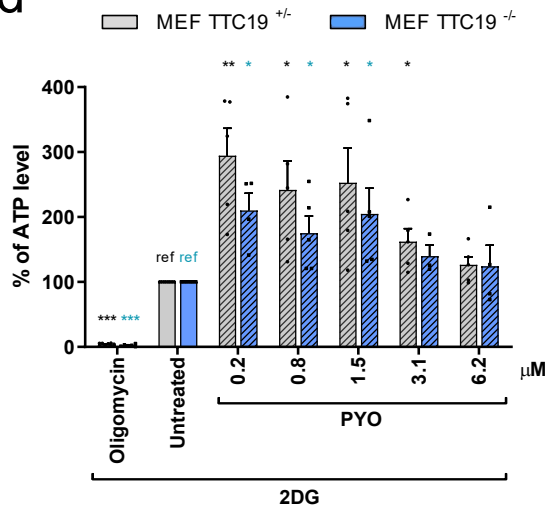

## SUPPLEMENTARY FIGURE LEGENDS

### Figure S1. PYO affects bioenergetics in MEF cells.

**a)** PYO accepts electrons from decylubiquinol and donates them to cytochrome c in the absence of mitochondria. Experiments were performed as described in the Methods section, without mitochondria. Compounds were added as indicated (means  $\pm$  SEM, n=4 independent samples). **b)** CIII activity was measured monitoring cytochrome c reduction as described in the Methods section. The capability of PYO to accept electrons from NADH was tested both in the absence of mitochondria, and in isolated mitochondria from MEF TTC19<sup>+/-</sup> after CIII inhibition by antimycinA (means  $\pm$  SEM). The number of measures over 3 independent samples is shown in the image. **c)** Extracellular Acidification Rate (ECAR) was measured in MEF TTC19<sup>+/-</sup> after the addition of 1.5  $\mu$ M PYO (means  $\pm$  SEM, n=3 independent experiments). **d)** Experiment performed as in Figure 11 but the data are reported as percentage of the luciferase signal emitted by the untreated sample and specified in the graph as “ref” (means  $\pm$  SEM, n=5 (MEF TTC19<sup>+/-</sup>) or 6 (MEF TTC19<sup>-/-</sup>) independent experiments). For all the panels statistical significance (one-way ANOVA with Dunnett’s Multiple comparison test or two-tailed Student’s *t*-test analysis) was determined (\* = p<0.05; \*\*=p<0.01; \*\*\*=p<0.001).



# Figure S2

**a**

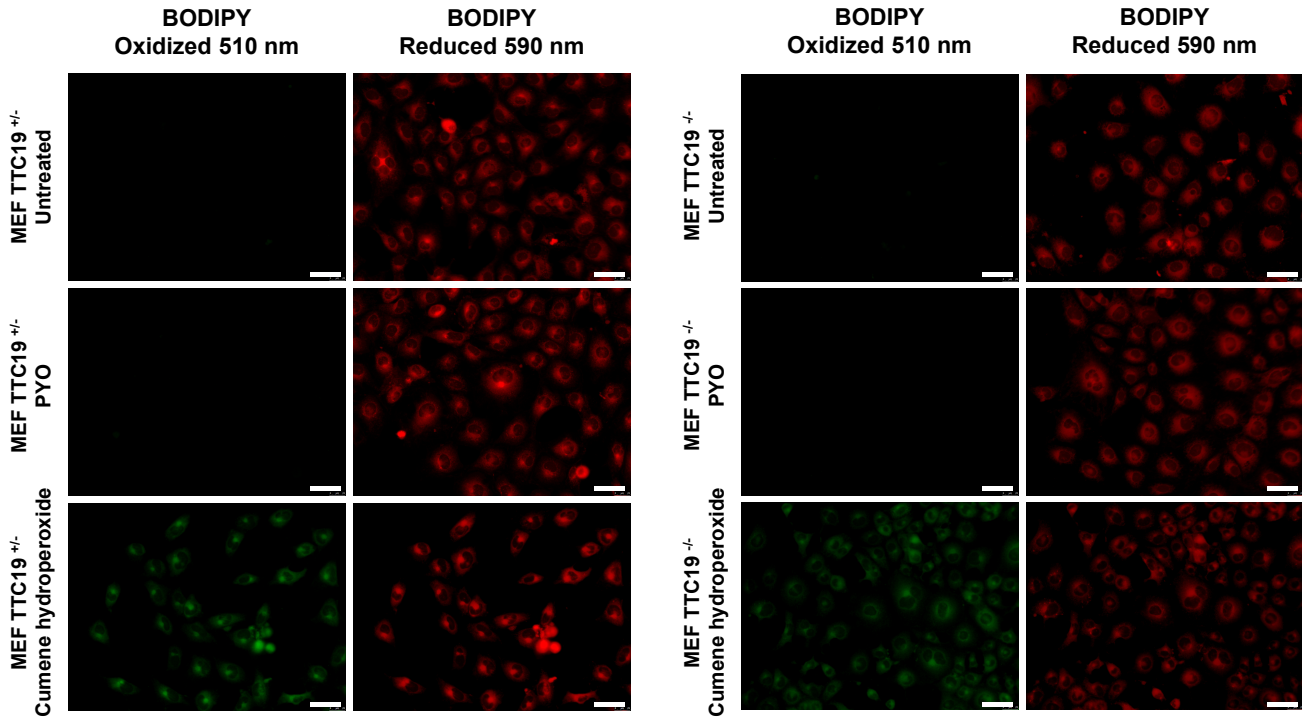

**b**

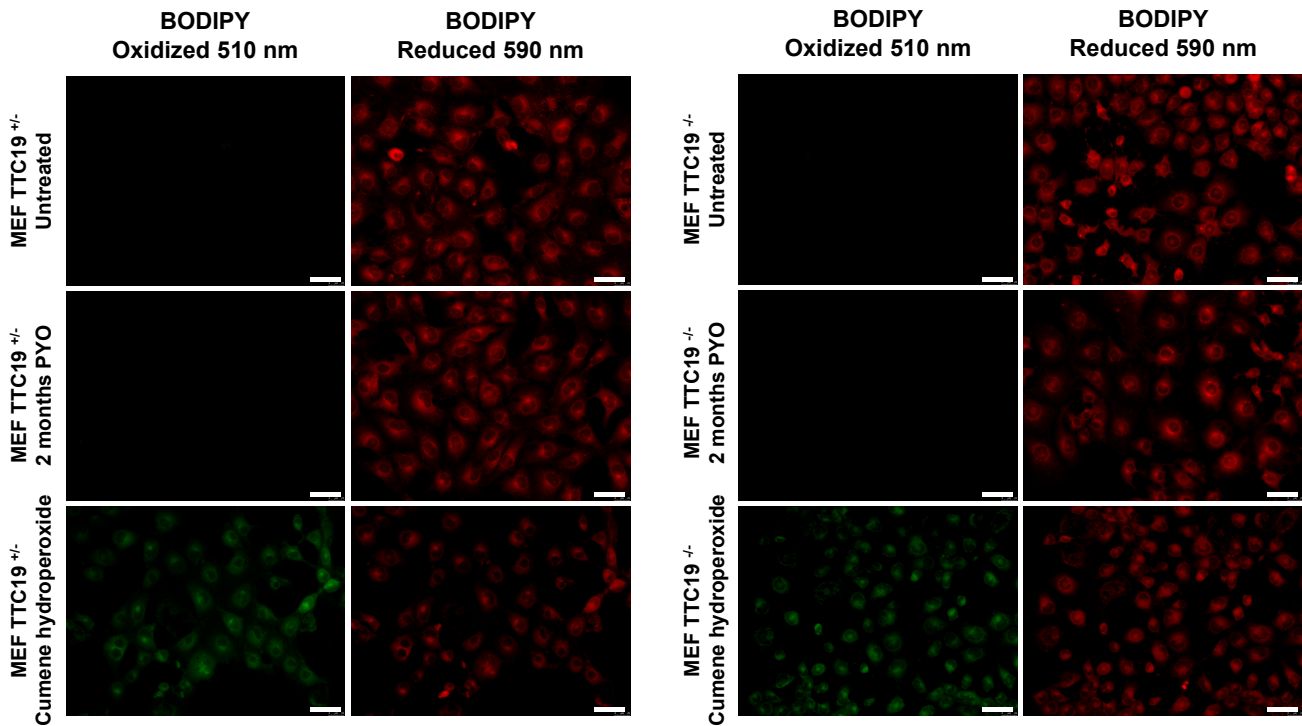

# Figure S2

c

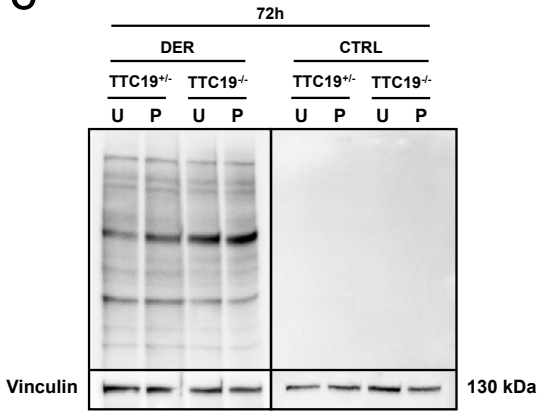

d

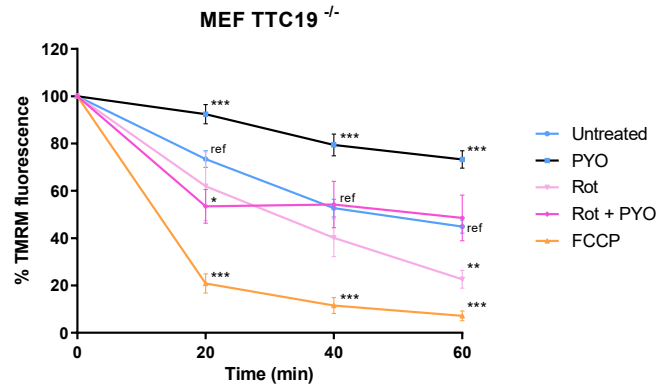

e

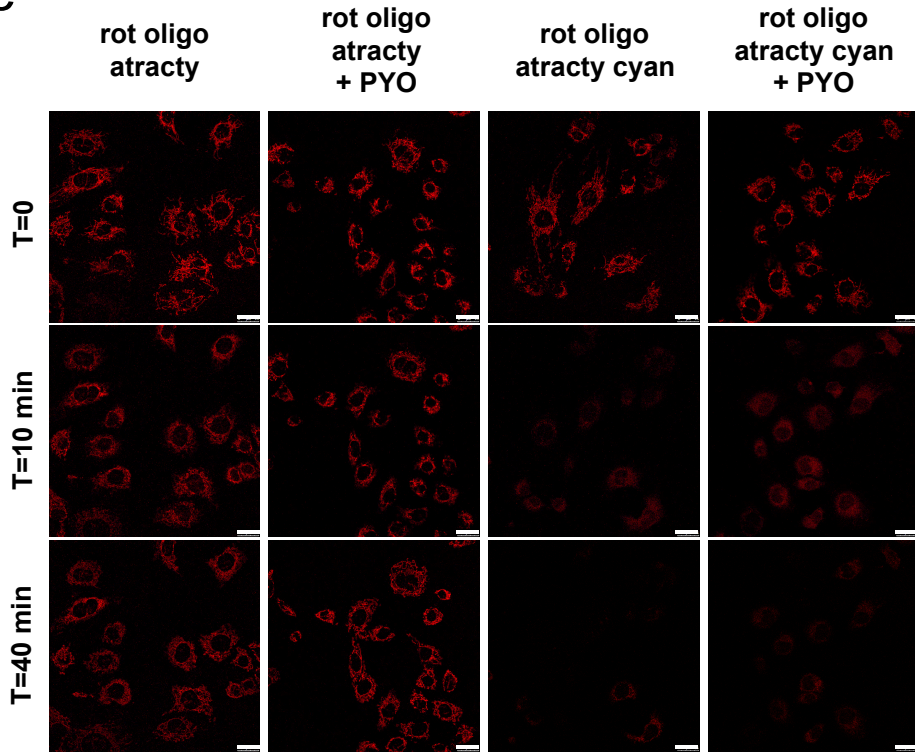

f

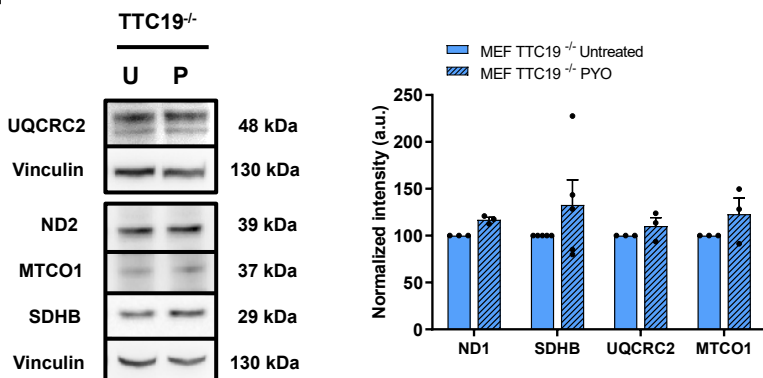

**Figure S2. PYO does not oxidize MEF proteins but has a tendency to increase RC expression in MEF TTC19<sup>-/-</sup>.**

**a-b)** Representative images of MEF TTC19<sup>+/-</sup> and MEF TTC19<sup>-/-</sup> either untreated or treated with 1.5  $\mu$ M PYO for 72 h (a) or for 2 months (b). Cumene hydroperoxide (CH) was used as positive control. Scale bars: 50  $\mu$ m. Quantifications of the images are present in Figures 2b-c. **c)** Representative Oxyblot related to the quantification presented in figure 2d. **d-e)** PYO maintains mitochondrial membrane potential when complex I (d) and complex V (e) are inhibited. In d, experiments were performed as in Figure 1h and 1i (means  $\pm$  SEM, n=6 independent experiments). In e, representative images were obtained as in Figure 1g and refer to Figure 1i. Scale bars: 25 $\mu$ m. **f)** Representative Western blot images (on the left) and the relative quantifications (on the right) of different proteins composing respiratory chain complexes: UQCRC2 for CIII, ND2 for CI, MTCO1 for CIV, SDHB for CII. MEF TTC19<sup>-/-</sup> were either untreated or treated with 1.5  $\mu$ M PYO for 72 h. Vinculin was used as loading control (means  $\pm$  SEM, for SDHB antibody n=5 independent experiments, for the others n=3 independent experiments). For all the panels statistical significance (two-way ANOVA with Bonferroni post-test or two-tailed Student's *t*-test analysis) was determined (\* = p<0.05; \*\*=p<0.01; \*\*\*=p<0.001).

# Figure S3

**a**

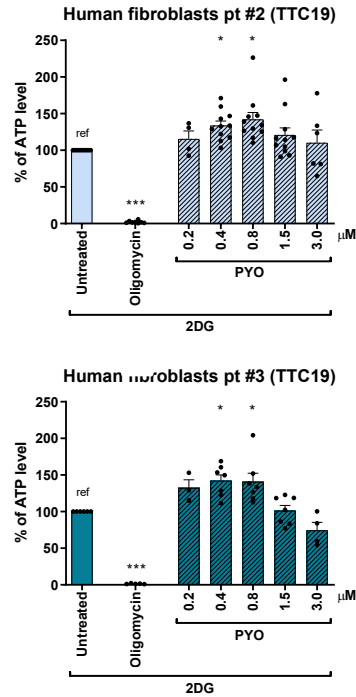

**b**

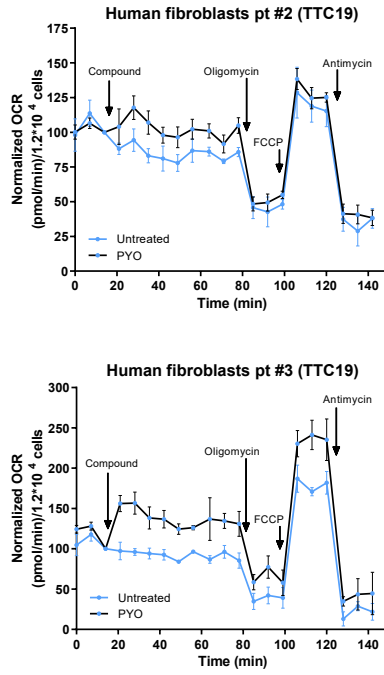

**c**

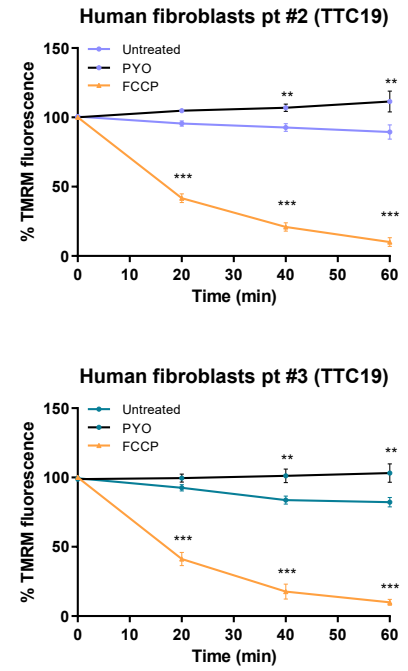

**d**

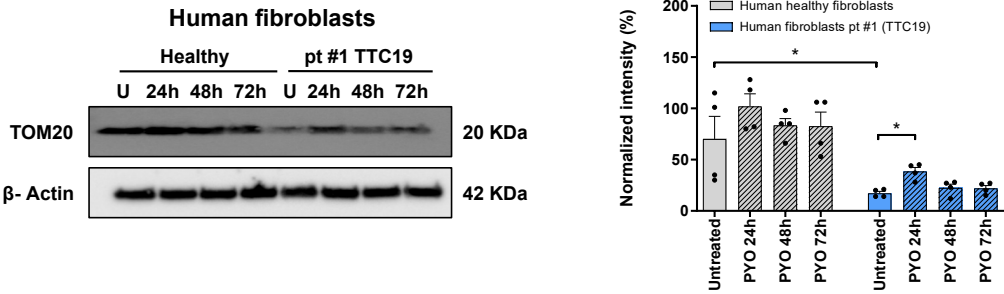

**e**

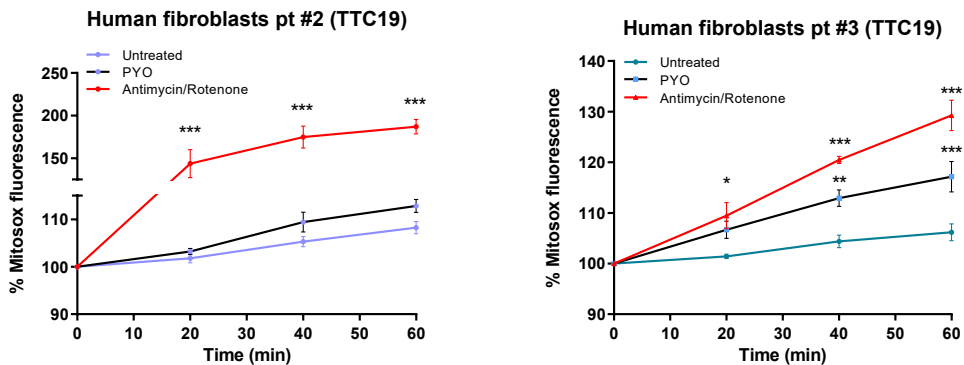

# Figure S3

f

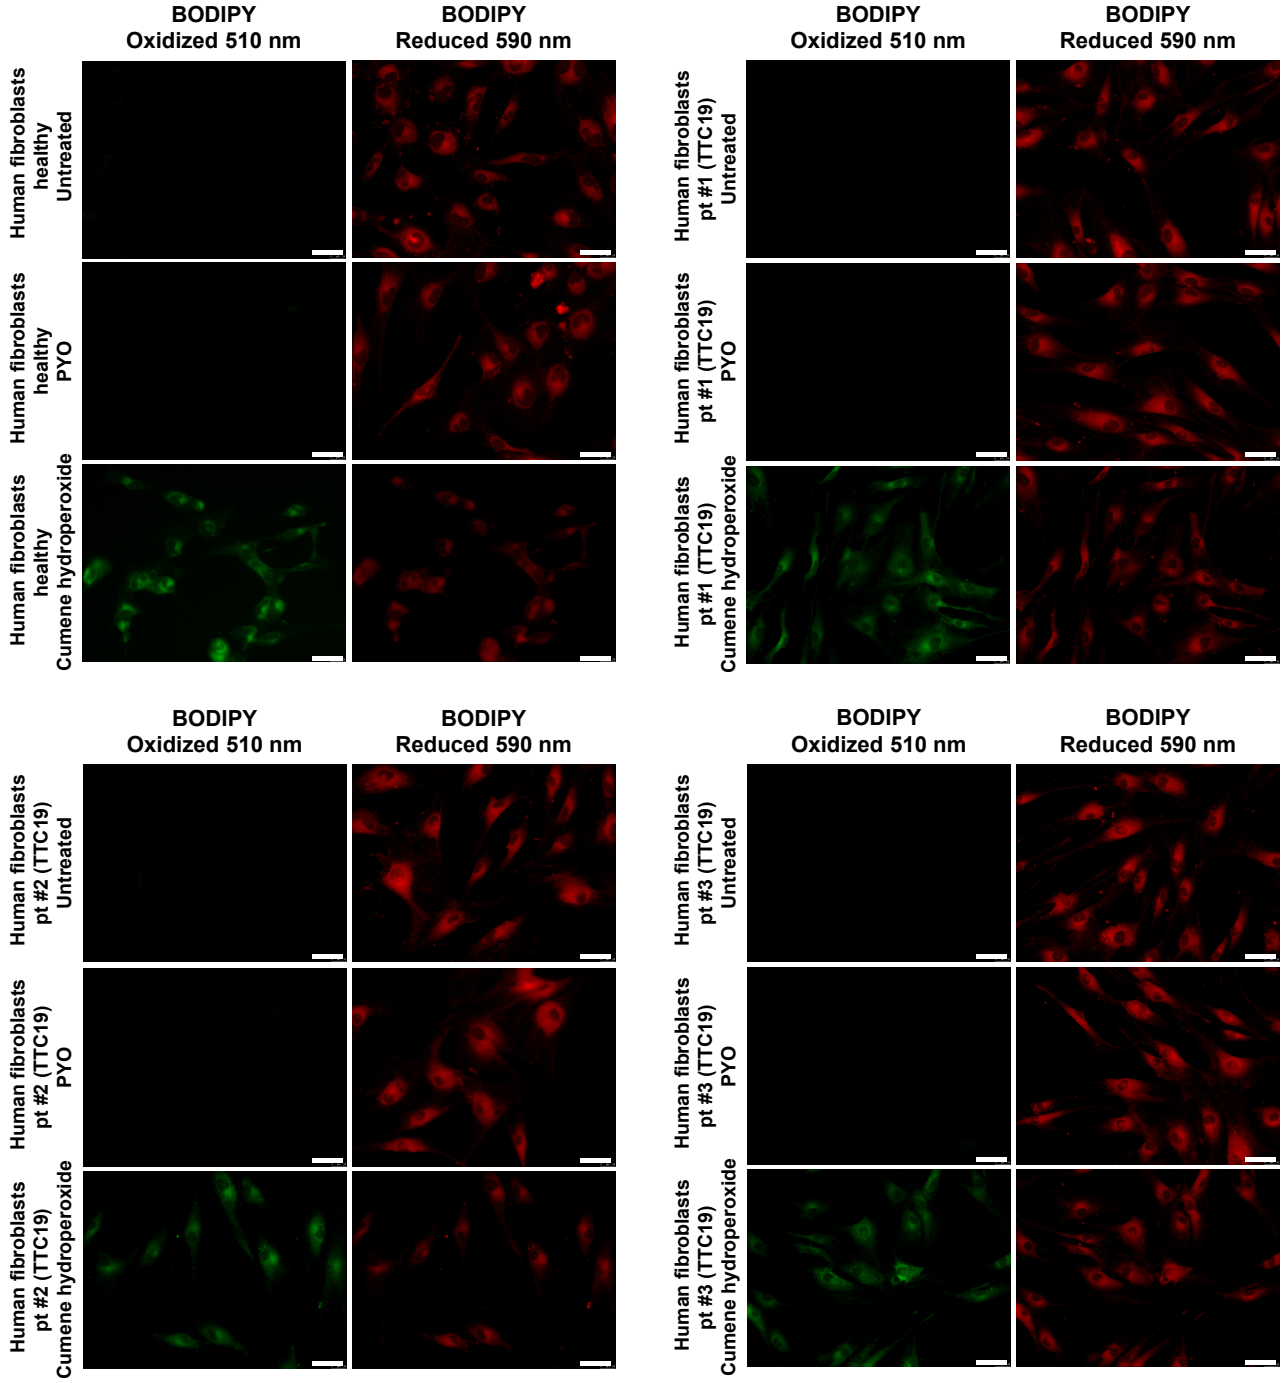

**Figure S3. PYO enhances bioenergetic efficiency in fibroblasts from two other patients with *TTC19* mutation.**

**a)** Cellular ATP of mitochondrial origin was measured in fibroblasts from patients #2 (n=11 independent assays) and #3 (n=7 independent assays) after treatment with PYO. Oligomycin was used as control. Cells were treated as in Figure 4b. Data are means  $\pm$  SEM. **b)** Oxygen consumption rate (OCR) was measured in fibroblasts from patients #2 (n=4 independent experiments) and #3 (n=3 independent experiments) in the presence or absence of 0.8  $\mu$ M PYO as in Figure 4d. Maximal respiration is reported in Figure 4e. Data shown are means  $\pm$  SEM normalized to the untreated sample. **c)** Mitochondrial membrane potential of fibroblasts from patients #2 (n=5 independent experiments) and #3 (n=6 independent experiments) was assessed monitoring the intensity of TMRM fluorescence after 0.8  $\mu$ M PYO addition as in Figure 4g. Data shown are means  $\pm$  SEM. **d)** PYO enhances the protein expression level of TOM20 in patient #1 fibroblasts. Experiments were performed as described in Figure 3d. Values are shown as means  $\pm$  SEM (n=3 independent experiments). **e)** Mitochondrial ROS production by fibroblasts from patients #2 and #3 was determined by measuring the intensity of Mitosox<sup>®</sup> fluorescence as in Figure 5b. Data are means  $\pm$  SEM (n=4 independent experiments). **f)** Representative fluorescence microscopy images of lipid peroxidation detection in human healthy fibroblasts and fibroblasts from patients #1, #2, #3, untreated or treated for 72 hours with 0.8  $\mu$ M PYO. Cumene Hydroperoxide (CH) was used as positive control. Bars: 50  $\mu$ m. Quantification is presented in Figure 5d. Statistical significance (one-way ANOVA with Dunnett's Multiple comparison test, two-way ANOVA with Bonferroni post-test, or two-tailed Student's *t*-test analysis) was determined (\* =  $p < 0.05$ ; \*\* =  $p < 0.01$ ; \*\*\* =  $p < 0.001$ ).

# Figure S4

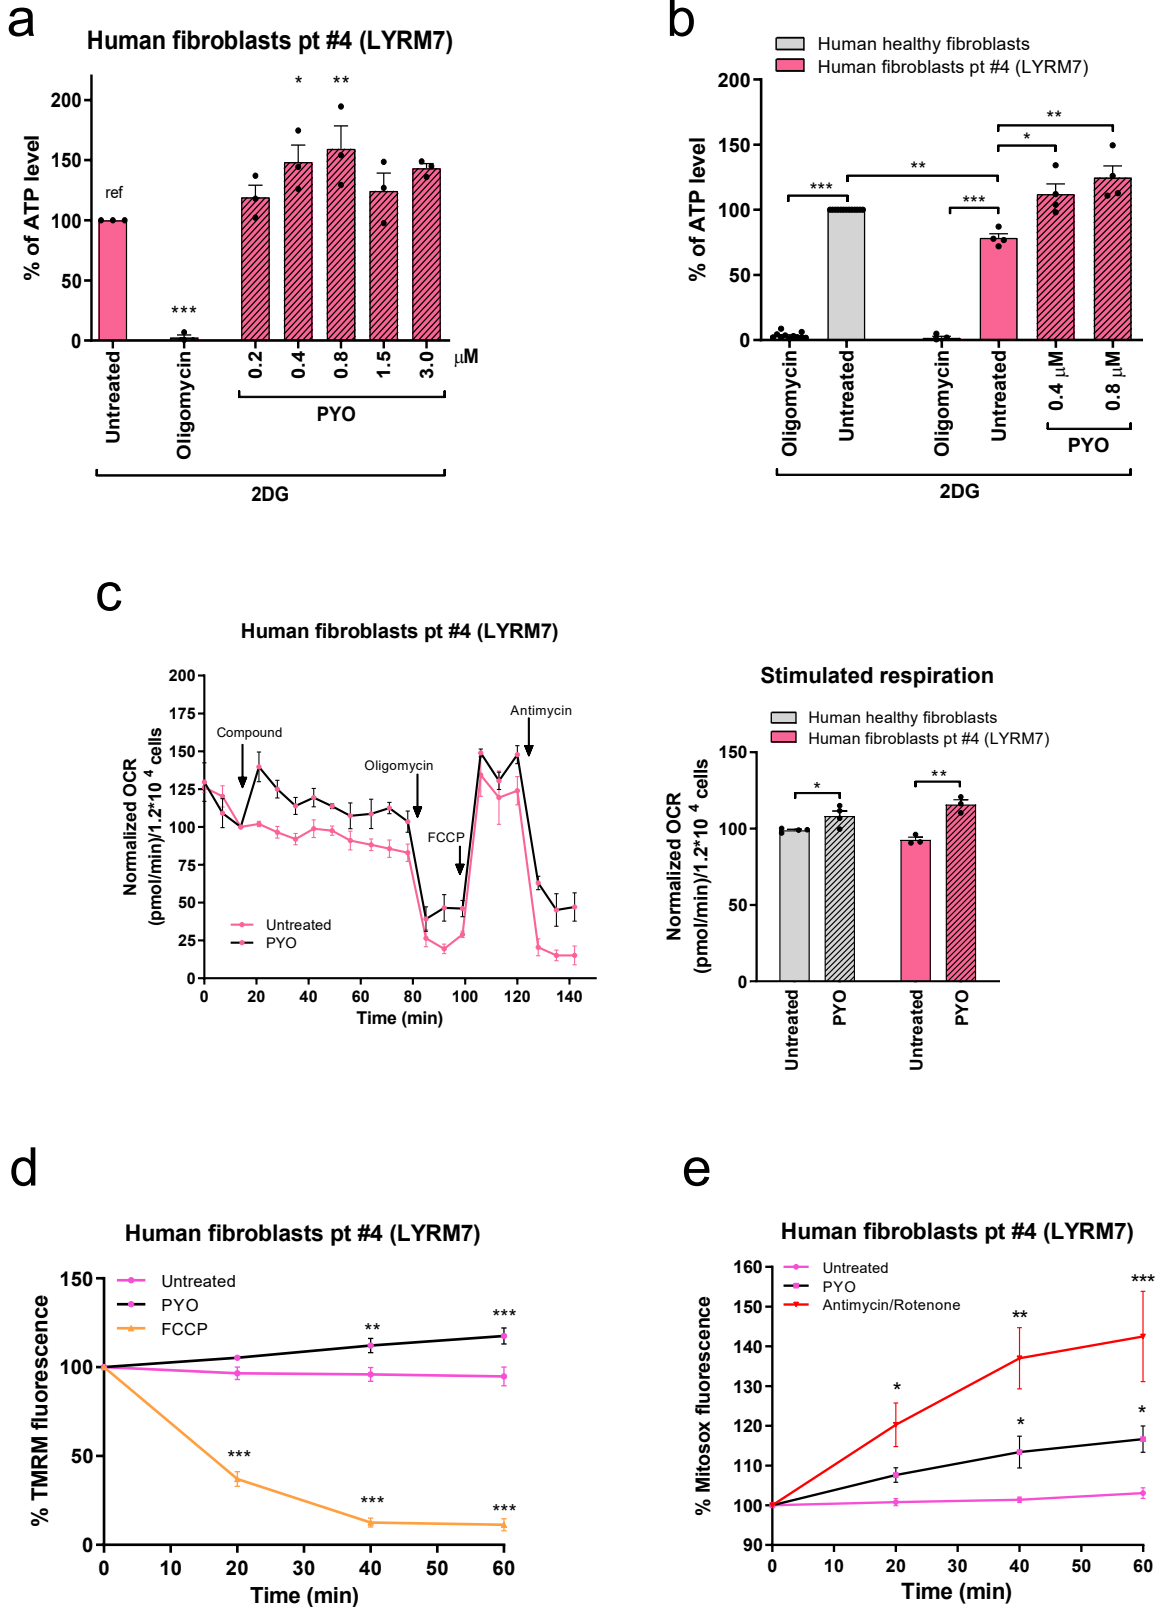

**Figure S4. PYO enhances bioenergetic efficiency in fibroblast of a patient with mutation of *LYRM7*.**

**a-b)** Cellular ATP of mitochondrial origin was measured in human healthy fibroblasts and fibroblasts from a patient harbouring a mutation in the *LYRM7* gene (human fibroblasts pt#4), with or without treatment with PYO. Oligomycin was used as control. Cells were treated for 1 h in a fresh medium, in which glucose was replaced with 5.5 mM 2-deoxyglucose (2DG), to inhibit glycolysis. In (a), values are reported as percentage of the luciferase signal with respect to the untreated sample, labeled “ref” in the figure (n=3 independent assays). In (b), values are reported as percentage of luciferase signal with reference to the untreated human healthy fibroblasts (in gray) (n=4 independent assays). Values are means  $\pm$  SEM. **c)** OCR by fibroblasts from patient #4 was measured in the presence or absence of 0.8  $\mu$ M PYO. Values were normalized with respect to the basal respiration recorded before compound addition, which was taken as 100%, and are the means  $\pm$  SEM (n=3 independent experiments). Bioenergetic parameters were calculated as in Figure 1d. Maximal respiration is reported on the right of the figure. Values are means  $\pm$  SEM with reference to the untreated sample (n=3 independent experiments). **d)** Mitochondrial membrane potential of patient #4 fibroblasts was assessed monitoring the intensity of TMRM fluorescence after 0.8  $\mu$ M PYO addition as in Figure 2h. Data shown are means  $\pm$  SEM (n=4 independent experiments). **e)** Mitochondrial ROS production by fibroblasts from patient #4 was monitored as in Figure S3e. Data shown are means  $\pm$  SEM (n=3 independent experiments). Statistical significance (one-way ANOVA with Dunnett’s Multiple comparison test, two-way ANOVA with Bonferroni post-test, or two-tailed Student’s *t*-test analysis) was determined (\* =  $p < 0.05$ ; \*\*= $p < 0.01$ ; \*\*\*= $p < 0.001$ ).



# Figure S5

**a**

Human fibroblasts pt #5 (BCS1L)

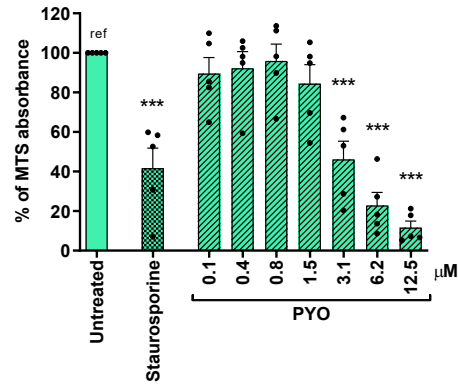

**b**

Human fibroblasts pt #5 (BCS1L)

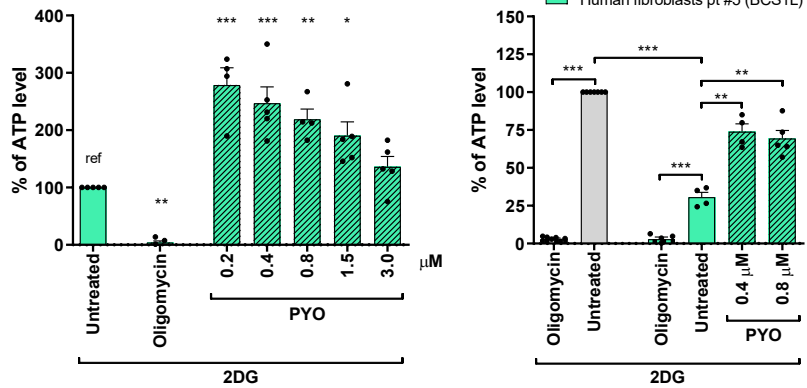

**c**

Human fibroblasts pt #5 (BCS1L)

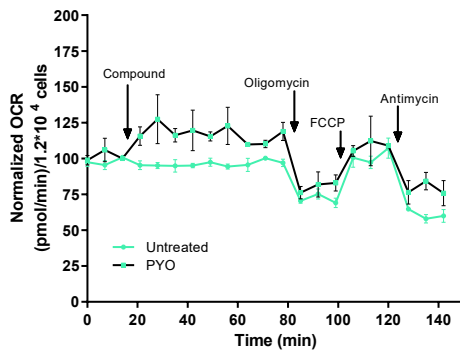

**d**

Human fibroblasts pt #5 (BCS1L)

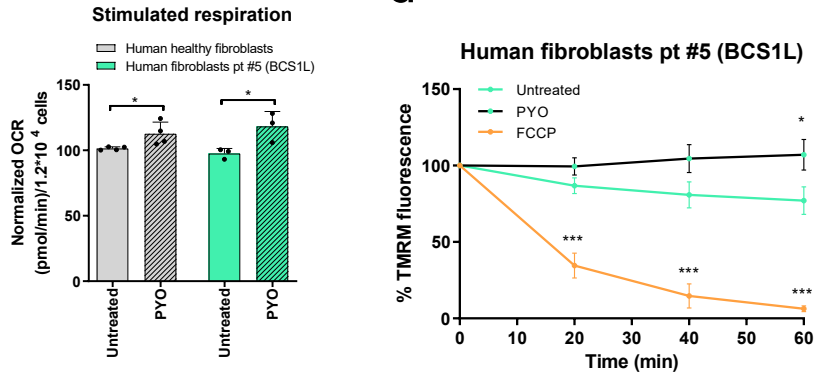

**e**

Human fibroblasts pt #5 (BCS1L)

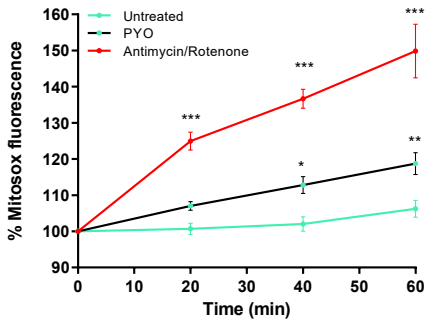

**f**

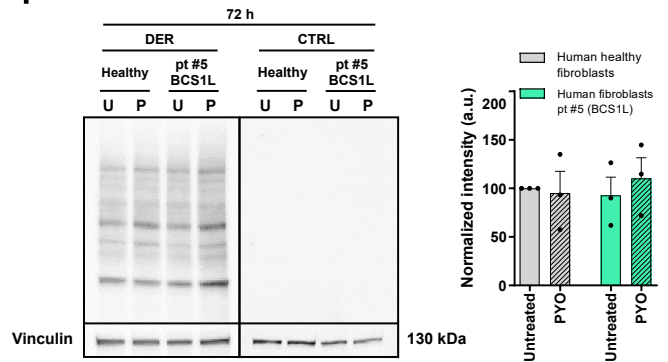

**g**

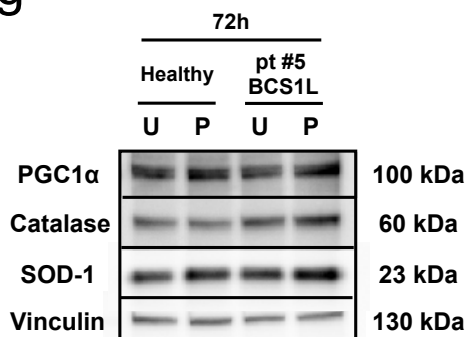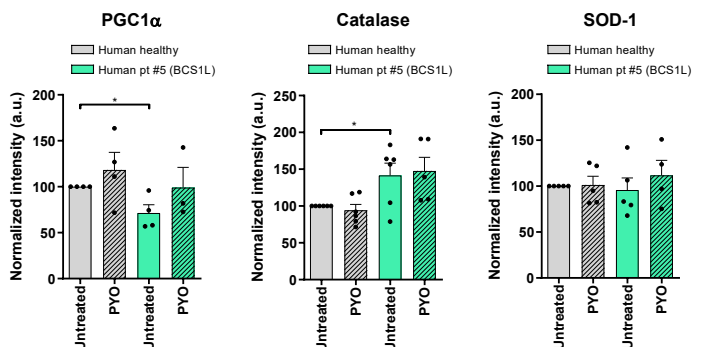

# Figure S5

h

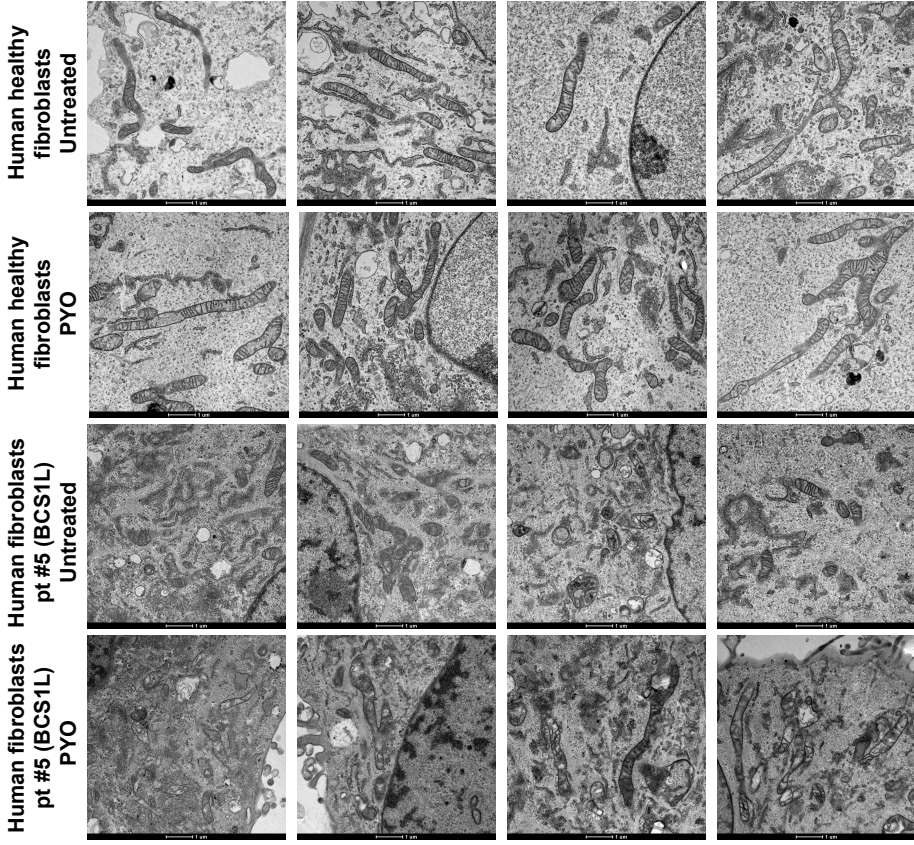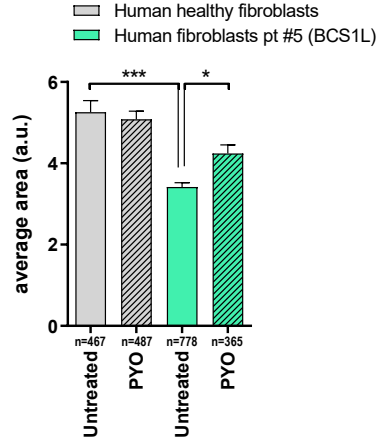

**Figure S5. PYO recovers mitochondrial function in fibroblasts from a patient with *BCS1L* mutation.**

**a)** Viability MTS assays were performed on fibroblasts from a patient harboring mutation in the *BCS1L* gene (human fibroblasts pt#5). Cells were either left untreated or treated with different dosages of PYO for 24 hours to determine PYO concentration that didn't affect cell survival. Positive control: 4  $\mu$ M staurosporine. Data are means  $\pm$  SEM of percentages of MTS absorbance (at 490 nm) with respect to the untreated sample (ref) (n=5 independent assays). **b)** Mitochondrial ATP content was measured healthy fibroblasts and fibroblasts from patient #5 as in Figure S4a-b. Values are means  $\pm$  SEM (n=5 independent assays). **c)** OCR by fibroblasts from patient #5 was measured in the presence or absence of 0.8  $\mu$ M PYO as in Figure S4c. Stimulated respiration were calculated as in Figure 1d. Values are means  $\pm$  SEM referring to the untreated sample (n=4 independent experiments). **d)** Mitochondrial membrane potential of patient #5 fibroblasts was assessed monitoring the intensity of TMRM fluorescence after 0.8  $\mu$ M PYO addition as in Figure 2h. Data shown are means  $\pm$  SEM (n=4). **e)** Mitochondrial ROS production of fibroblasts from patients #5 was monitored as in Figure S3e. Data shown are means  $\pm$  SEM (n=4 independent experiments). **f)** Representative Oxyblot and the quantification of the protein oxidation level in healthy fibroblasts and fibroblasts from patient #5, both untreated and treated with 0.8  $\mu$ M PYO for 72 h (means  $\pm$  SEM, n=3 biologically independent samples). **g)** Representative Western blot and the relative quantification of the indicated protein expression levels in healthy fibroblasts and fibroblasts from patients #5, both untreated and treated with 0.8  $\mu$ M PYO for 72 h as in Figure 2f (means  $\pm$  SEM, for PGC1 $\alpha$  antibody n=4 independent experiments, for catalase antibody n=6 independent experiments, for SOD-1 antibody n=5 independent experiments). **h)** Representative transmission electron microscopy images of healthy fibroblasts and fibroblasts from patient #5, untreated or treated for 72 hours with 0.8  $\mu$ M PYO. Data are means  $\pm$  SEM. The number of counted mitochondria is shown in the image. Statistical significance (one-way ANOVA with Dunnett's Multiple comparison test, two-way ANOVA with Bonferroni post-test, or two-tailed Student's *t*-test) was determined for all panels (\* =  $p < 0.05$ ; \*\*= $p < 0.01$ ; \*\*\*= $p < 0.001$ ).



# Figure S6

a

Ctrl MO

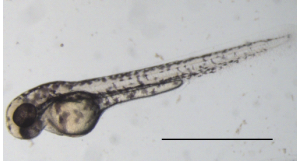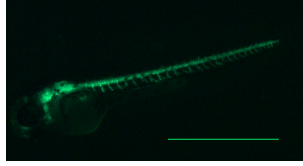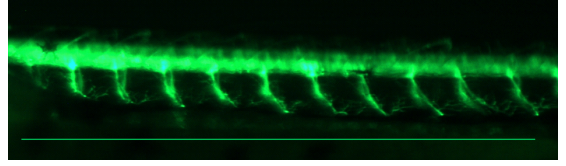

Ttc19 spMO

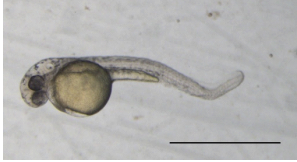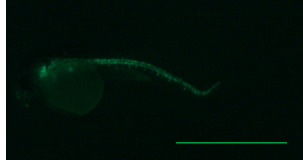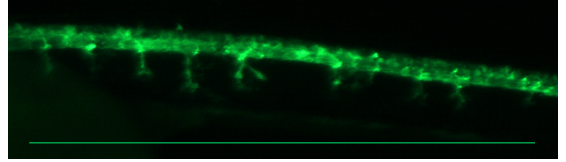

Ttc19 spMO+PYO

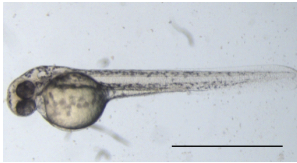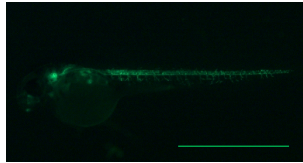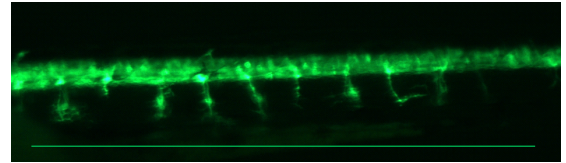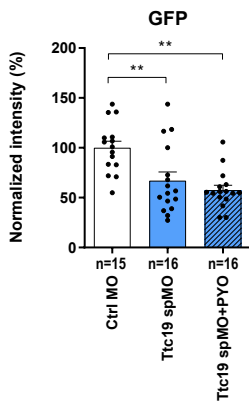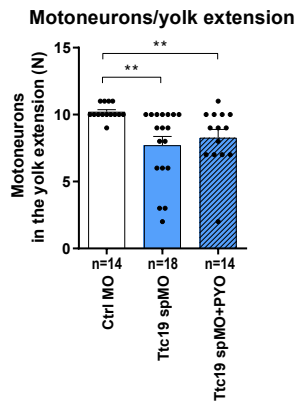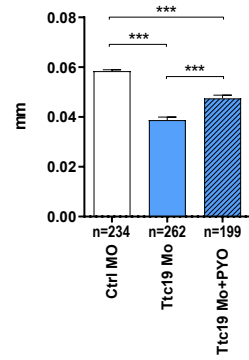

b

Untreated

PYO 10 nmol/g

Nucleus

Mitochondria-ER

Nucleus

Mitochondria-ER

Muscle

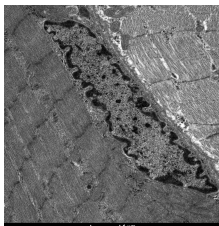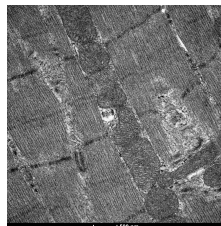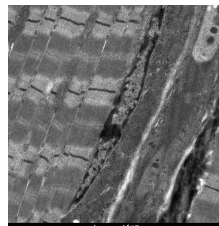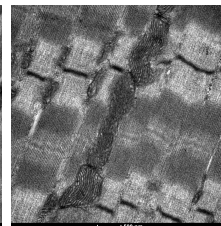

Brain

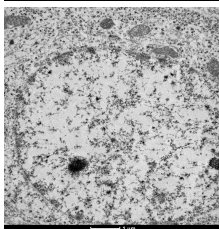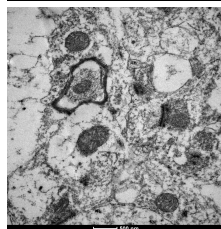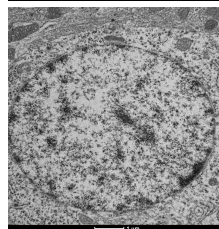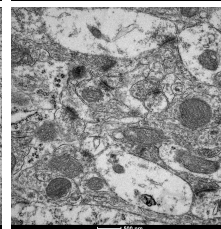

**Figure S6. PYO affects axon development in zebrafish embryos and does not alter cellular ultrastructure in WT mice upon long-term treatment.**

**a)** *D. Rerio* embryos were treated as in Figure 7c. The peripheral nervous system was investigated in Tg(mnx1:mGFP), which specifically highlights motoneurons in vivo. *TTC19* knock-down reduces GFP expression and the number of motoneurons in the region of the yolk extension (N/Area). PYO supplementation does not rescue those parameters, however PYO improves axons development in comparison to DMSO treated embryos. Values are means  $\pm$  SEM. Quantifications of GFP expression, the number and the length of motoneuron in the region of the yolk extension are present in the figure. The numbers of the manipulated embryo and the numbers of the motoneuron counted for each condition are represented in the image. Bars: 1 mm. Statistical significance (two-tailed Student's *t*-test) was determined (\*=  $p < 0.05$ ; \*\*= $p < 0.01$ ; \*\*\*= $p < 0.001$ ). Bright-field images and green-fluorescent images of morphants are shown. Magnifications: 2.5X and 12 X. Bars: 1 mm. **b)** Representative TEM images of muscle and brain sections from mice untreated or treated with PYO (10 nmol/g). See also Figure 8d. Nucleus, mitochondria, ER, and the other detected organelles did not show any visible alterations. Scale bars related to Nucleus images: 1 $\mu$ m. Scale bars related to Mitochondria-ER images: 500 nm.

**Movie 1. *TTC19* KD zebrafish recover ETR after the treatment with 100 nM PYO.** It is shown that ETR is induced by a single and gentle stimulation at the tail of the larvae, which leads the embryo escaping to reach the border of 15 cm Petri disk.

**Movie 2. PYO shows no toxicity in vivo in mice.** The movie shows adult mice treated with PYO (10 nmol/gbw) i.p. once daily, 5 days a week, for two months. Mice are active and show no signs of distress.

Supplementary Table 1.

Primers used in the study.

| Target                                 | Sequence (From 5' to 3') |
|----------------------------------------|--------------------------|
| <i>m PGCl<math>\alpha</math></i> (for) | GGACATGTGCAGCCAAGACTCT   |
| <i>m PGCl<math>\alpha</math></i> (rev) | CACTTCAATCCACCCAGAAAGCT  |
| <i>m Actin</i> (for)                   | CTAAGGCCAACCGTGAAAAG     |
| <i>m Actin</i> (rev)                   | ACCAGAGGCATACAGGGACA     |
| <i>d Rp49</i> (for)                    | ATCGGTTACGGATCGAACAA     |
| <i>d Rp49</i> (rev)                    | GACAATCTCCTTGCGCTTCT     |
| <i>d PGCl<math>\alpha</math></i> (for) | GGAGGAAGACGTGCCTTCTG     |
| <i>d PGCl<math>\alpha</math></i> (rev) | TACATTCGGTGCTGGTGCTT     |
